# Supplementary material
Source: PubMed Central journal article supplement (PMC5862743)
Supplement: NIHMS925989-supplement.pdf [file NIHMS925989-supplement.pdf]

## Altered Gradients of Glutamate and $\gamma$ -Aminobutyric Acid Transcripts in the Cortical Visuospatial Working Memory Network in Schizophrenia

### *Supplemental Information*

#### **Supplemental Methods**

Our experimental design controlled for batch effects within subject pairs and across regions within subjects (i.e., all transcripts from all regions of both subjects in a pair were assayed on the same qPCR plate), but necessarily limited the number of transcripts that could be studied, excluding the possibility of examining other glutamate or GABA receptor transcripts. Thus, the functionally-analogous markers of glutamate and GABA neurotransmission were selected for the following reasons: glutaminase (GLS1) and the 67 kD isoform of glutamic acid decarboxylase (GAD67) are the enzymes that synthesize most cortical glutamate and GABA, respectively (1-3); the vesicular glutamate (vGLUT1) and GABA (vGAT) transporters package their respective neurotransmitters into presynaptic vesicles in cortical axon terminals (4,5); EAAT2, the glutamate transporter localized to astrocytes, is responsible for the removal of most of the glutamate from the synaptic space (6); GAT1, the GABA transporter that is abundant in the neocortex and localized to neuronal and glial membranes (7,8), is responsible for the removal of most GABA from the synapse (9); GRIA2 is enriched in layer 3 of primate neocortex (10), is present in the majority of neocortical AMPA receptors, and is important for AMPA receptor calcium permeability (11); GRIN1 is required to assemble a functional NMDA receptor (12); and GABRG2 is present in the majority of GABA<sub>A</sub> receptors and is required to render a synaptically located ionotropic GABA receptor functional (13).

In addition to prior evidence, the use of the internal reference genes (Beta-Actin [ACTB] and Cyclophilin-A [CYCLO]) was supported by our findings of the absence of region by diagnosis interaction ( $F_{3,114}=1.1$ ;  $p=0.35$ ) effect in transcript expression levels for beta actin normalized against cyclophilin using the mixed model described in the main text. Furthermore, expression ratios of these normalizers differed between subject groups by only 1.6-7.1% across the four regions, and there was no significant effect of diagnosis on normalizer transcript expression levels when corrected for multiple comparisons ( $F_{1,113}=4.0$ ;  $p>0.10$ ). Finally, the opposite differences

between diagnostic groups in the regional patterns of glutamate and GABA transcript expression support the absence of any systematic regional or diagnostic effects of normalizers.

For the composite measures, the glutamate composite score was computed as the sum of the normalized (Z-score) expression levels for each of the five transcripts. For each expression ratio value, we calculated the Z-score =  $((X - \mu) / \sigma)$ , where  $\mu$  is the mean of the group,  $\sigma$  is the standard deviation of the group, and X is the individual transcript measure. Then, we summed the Z-scores of all glutamate transcripts across subjects within a group for each region, an approach that provides equal weight to each transcript. The same approach was used for calculating the GABA composite score for the four GABA transcripts measured.

As noted in the Methods and Materials, the potential confounding effect of antipsychotic medications, nicotine or other substances of abuse, suicide and other factors frequently comorbid with schizophrenia were also examined (**Supplemental Table S3**). Regression or two-sample t-tests were used to check the relationship of the expression level in schizophrenia to each of the comorbid factors, where the expression level in schizophrenia subjects was contrasted with the matched unaffected comparison subject (i.e., (S-C)/C).

**Supplemental Table S1. Demographic, postmortem, and clinical characteristics of human subjects used in this study.**

| Unaffected Comparison Subjects |       |              |     |                  |                              |     |     |                             | Subjects with Schizophrenia |                                             |              |     |                  |                              |     |     |                                     |                 |                        |                             |                                        |
|--------------------------------|-------|--------------|-----|------------------|------------------------------|-----|-----|-----------------------------|-----------------------------|---------------------------------------------|--------------|-----|------------------|------------------------------|-----|-----|-------------------------------------|-----------------|------------------------|-----------------------------|----------------------------------------|
| Pair                           | Case  | Sex/<br>Race | Age | PMI <sup>a</sup> | Storage<br>Time <sup>b</sup> | RIN | pH  | Cause of Death              | Case                        | DSM IV diagnosis                            | Sex/<br>Race | Age | PMI <sup>a</sup> | Storage<br>Time <sup>b</sup> | RIN | pH  | Cause of Death                      | Tobacco<br>ATOD | Anti-psychotic<br>ATOD | Anti-<br>depressant<br>ATOD | Benzodiazepine/<br>Anticonvulsant ATOD |
| 1                              | 1196  | F/W          | 36  | 14.5             | 132                          | 8.2 | 6.4 | Asphyxiation                | 537                         | Schizoaffective disorder                    | F/W          | 37  | 14.5             | 236                          | 8.6 | 6.7 | Suicide by hanging                  | Unknown         | No                     | No                          | No                                     |
| 2                              | 546   | F/W          | 37  | 23.5             | 235                          | 8.6 | 6.7 | ASCVD                       | 587                         | Chronic undifferentiated schizophrenia; AAR | F/B          | 38  | 17.8             | 228                          | 9.0 | 7.0 | Myocardial hypertrophy              | Yes             | Yes                    | No                          | Yes                                    |
| 3                              | 681   | M/W          | 51  | 11.6             | 215                          | 8.9 | 7.2 | Hypertrophic cardiomyopathy | 640                         | Chronic paranoid schizophrenia              | M/W          | 49  | 5.2              | 220                          | 8.4 | 6.9 | Pulmonary embolism                  | Unknown         | Yes                    | Yes                         | No                                     |
| 4                              | 852   | M/W          | 54  | 8.0              | 183                          | 9.1 | 6.8 | Cardiac tamponade           | 781                         | Schizoaffective disorder; ADR               | M/B          | 52  | 8.0              | 198                          | 7.7 | 6.7 | Peritonitis                         | Yes             | Yes                    | Yes                         | No                                     |
| 5                              | 1047  | M/W          | 43  | 13.8             | 150                          | 9.0 | 6.6 | ASCVD                       | 1209                        | Schizoaffective disorder                    | M/W          | 35  | 9.1              | 130                          | 8.7 | 6.5 | Suicide by diphenhydramine overdose | No              | Yes                    | No                          | No                                     |
| 6                              | 1092  | F/B          | 40  | 16.6             | 143                          | 8.0 | 6.8 | Mitral valve prolapse       | 1178                        | Schizoaffective disorder                    | F/B          | 37  | 18.9             | 135                          | 8.4 | 6.1 | Pulmonary embolism                  | Yes             | Yes                    | No                          | Yes                                    |
| 7                              | 1122  | M/W          | 55  | 15.4             | 140                          | 7.9 | 6.7 | Cardiac tamponade           | 1105                        | Schizoaffective disorder                    | M/W          | 53  | 7.9              | 142                          | 8.9 | 6.2 | ASCVD                               | Yes             | Yes                    | No                          | No                                     |
| 8                              | 1284  | M/W          | 55  | 6.4              | 119                          | 8.7 | 6.8 | ASCVD                       | 1188                        | Undifferentiated schizophrenia; AAR; OAR    | M/W          | 58  | 7.7              | 133                          | 8.4 | 6.2 | ASCVD                               | Yes             | Yes                    | No                          | No                                     |
| 9                              | 1191  | M/B          | 59  | 19.4             | 132                          | 8.4 | 6.2 | ASCVD                       | 1263                        | Undifferentiated schizophrenia; ADR         | M/W          | 62  | 22.7             | 122                          | 8.5 | 7.1 | Accidental asphyxiation             | Yes             | Yes                    | Yes                         | No                                     |
| 10                             | 10003 | M/W          | 49  | 21.2             | 132                          | 8.4 | 6.5 | Trauma                      | 1088                        | Undifferentiated schizophrenia; ADC; OAC    | M/W          | 49  | 21.5             | 144                          | 8.1 | 6.5 | Accidental combined drug overdose   | Yes             | Yes                    | Yes                         | No                                     |
| 11                             | 1247  | F/W          | 58  | 22.7             | 124                          | 8.4 | 6.4 | ASCVD                       | 1240                        | Undifferentiated schizophrenia; ADR         | F/B          | 50  | 22.9             | 125                          | 7.7 | 6.3 | ASCVD                               | Yes             | Yes                    | No                          | No                                     |
| 12                             | 1099  | F/W          | 24  | 9.1              | 142                          | 8.6 | 6.5 | Cardiomyopathy              | 10023                       | Disorganized schizophrenia                  | F/B          | 25  | 20.1             | 123                          | 7.4 | 6.7 | Suicide by drowning                 | No              | Yes                    | No                          | Yes                                    |
| 13                             | 1307  | M/B          | 32  | 4.8              | 114                          | 7.6 | 6.7 | ASCVD                       | 10024                       | Paranoid schizophrenia                      | M/B          | 37  | 6.0              | 123                          | 7.5 | 6.1 | ASCVD                               | No              | No                     | No                          | No                                     |
| 14                             | 1391  | F/W          | 51  | 7.8              | 100                          | 7.1 | 6.6 | ASCVD                       | 1189                        | Schizoaffective disorder; AAR               | F/W          | 47  | 14.4             | 133                          | 8.3 | 6.4 | Suicide by combined drug overdose   | Yes             | Yes                    | Yes                         | Yes                                    |
| 15                             | 1159  | M/W          | 51  | 16.7             | 136                          | 7.6 | 6.5 | ASCVD                       | 1296                        | Undifferentiated schizophrenia              | M/W          | 48  | 7.8              | 116                          | 7.3 | 6.5 | Pneumonia                           | Yes             | Yes                    | Yes                         | No                                     |
| 16                             | 1326  | M/W          | 58  | 16.4             | 110                          | 8.0 | 6.7 | ASCVD                       | 1314                        | Undifferentiated schizophrenia              | M/W          | 50  | 11.0             | 113                          | 7.2 | 6.2 | ASCVD                               | No              | Yes                    | Yes                         | No                                     |
| 17                             | 1268  | M/B          | 49  | 19.9             | 121                          | 7.9 | 7.1 | ASCVD                       | 1230                        | Undifferentiated schizophrenia              | M/W          | 50  | 16.9             | 127                          | 8.2 | 6.6 | Suicide by doxepin overdose         | Yes             | Yes                    | Yes                         | No                                     |
| 18                             | 1386  | M/W          | 46  | 21.2             | 100                          | 8.3 | 6.7 | ASCVD                       | 1420                        | Schizoaffective disorder; AAR; ODC; OAR     | M/W          | 47  | 23.4             | 94                           | 8.2 | 6.8 | Suicide by jump                     | Yes             | Yes                    | Yes                         | No                                     |
| 19                             | 1372  | M/W          | 37  | 20.5             | 104                          | 9.0 | 6.6 | Asphyxiation                | 1581                        | Paranoid schizophrenia; ODC; OAC            | M/W          | 32  | 18.4             | 64                           | 9.0 | 6.8 | ASCVD                               | Yes             | Yes                    | Yes                         | No                                     |
| 20                             | 1583  | M/W          | 58  | 19.1             | 63                           | 8.2 | 6.8 | Trauma                      | 1686                        | Schizophrenia, paranoid type; AAR           | M/B          | 56  | 14.1             | 47                           | 8.3 | 6.2 | ASCVD                               | Yes             | Yes                    | Yes                         | Yes                                    |

<sup>a</sup> PMI, postmortem interval (hours); <sup>b</sup> Storage time (months) at -80C; <sup>c</sup> First degree relative with schizophrenia; Other abbreviations: ASCVD, arteriosclerotic cardiovascular disease; MCA, middle cerebral artery; ATOD, at time of death; ADC, alcohol dependence, current at time of death; ADR, alcohol dependence, in remission at time of death; AAC, alcohol abuse, current at time of death; AAR, alcohol abuse, in remission at time of death; ODC, other substance dependence, current at time of death; ODR, other substance dependence, in remission at time of death; OAC, other substance abuse, current at time of death; OAR, other substance abuse, in remission at time of death; U, unknown; ISP, index of social position; M, male; F, female; W, white; B, black.

**Supplemental Table S2. qPCR Primer Design.**

| Gene                              | Species | Accession # | Position  | Forward Primer (F)<br>Reverse Primer (R)                 |
|-----------------------------------|---------|-------------|-----------|----------------------------------------------------------|
| EAAT2 (SLC1A2)<br>Isoform 1       | Human   | NM_004171   | 433-502   | (F) GAGGCGCTAAAAGGGCTTAC<br>(R) GGGAGCGGTATTTAAGAGGAG    |
| GABRG2                            | Human   | NM_000816   | 1527-1644 | (F) AAATGAATAATGCTACACACCTTCA<br>(R) CAAGCTCCTGTTGACAATC |
| GAD67 (GAD1)                      | Human   | NM_000817   | 2495-2550 | (F) GTTTCCCGCTCCAAGAGAAT<br>(R) TGGAGTTGTTGGACAAGCTG     |
| GAT1 (SLC6A1)                     | Human   | NM_003042   | 936-1065  | (F) CTGGACTGGAAAAGTGTTGCTA<br>(R) GCGGAAGTTGGGTGTGAT     |
| GLS1                              | Human   | NM_014905   | 1945-2020 | (F) GCATATACTGGAGATGTGGTCGC<br>(R) AATCATAGTCCCGCTGTTCC  |
| GRIA2; FLIP<br>(Variants 1 and 3) | Human   | NM_000826   | 2719-2850 | (F) GGCATCGCAACACCTAAA<br>(R) CTTGGCTCCACATTCACCT        |
| GRIN1                             | Human   | NM_000832   | 2317-2402 | (F) TCCCTGTCCATCCTCAAGTC<br>(R) CGCGAGTCACATTCCTGATA     |
| vGAT                              | Human   | NM_080552   | 1262-1347 | (F) CAGCGAGTTCCACTGCAT<br>(R) AGGTGAGGTAGGCGACGA         |
| vGLUT1                            | Human   | NM_020309   | 436-559   | (F) GGTTTTCGGCTTTGCTATTG<br>(R) ATGTGACGCCCTCTACCAAC     |
| ACTB                              | Human   | NM_001101   | 1146-1246 | (F) GATGTGGATCAGCAAGCA<br>(R) AGAAAGGGTGTAACGCAACTA      |
| CYCLO                             | Human   | NM_021130   | 159-284   | (F) GCAGACAAGGTCCCAAAG<br>(R) GAAGTCACCACCCTGACAAC       |

**Supplemental Table S3. Comorbid factor analysis for individual transcripts in all regions**

| Region | Transcript | Suicide |      | Antipsychotic |      | Antidepressant |      | Anticonvulsant<br>Benzodiazepine |      | Nicotine |      |
|--------|------------|---------|------|---------------|------|----------------|------|----------------------------------|------|----------|------|
|        |            | t       | P*   | t             | P*   | t              | P*   | t                                | P*   | t        | P*   |
| DLPFC  | EAAT2      | 0.9     | 0.91 | 0.5           | 0.87 | -0.8           | 0.64 | 0.4                              | 0.82 | 2.0      | 0.64 |
|        | vGLUT1     | -0.3    | 0.93 | -2.8          | 0.15 | -1.4           | 0.46 | 0.2                              | 0.91 | -0.2     | 0.46 |
|        | GLS1       | 1.8     | 0.56 | -1.1          | 0.81 | -0.9           | 0.64 | 0.8                              | 0.82 | -1.1     | 0.64 |
|        | GRIA2      | 2.0     | 0.56 | -3.0          | 0.15 | -2.5           | 0.14 | 1.2                              | 0.82 | -0.5     | 0.14 |
|        | GRIN1      | 0.5     | 0.93 | 2.6           | 0.15 | 0.5            | 0.71 | 1.2                              | 0.82 | -0.3     | 0.71 |
|        | GAD67      | 1.7     | 0.56 | 0.2           | 0.96 | -0.7           | 0.64 | -0.5                             | 0.82 | 0.9      | 0.64 |
|        | vGAT       | 0.3     | 0.93 | 0.1           | 0.96 | 0.3            | 0.77 | -1.1                             | 0.82 | 1.6      | 0.77 |
|        | GAT1       | -0.5    | 0.93 | -0.3          | 0.96 | -0.3           | 0.77 | -0.7                             | 0.82 | 2.7      | 0.77 |
|        | GABRG2     | 0.8     | 0.91 | -0.6          | 0.87 | -0.7           | 0.64 | 1.4                              | 0.82 | -0.5     | 0.64 |
| PPC    | EAAT2      | -0.4    | 0.93 | -0.7          | 0.87 | -0.8           | 0.64 | -0.7                             | 0.82 | 0.5      | 0.64 |
|        | vGLUT1     | 2.0     | 0.56 | -1.2          | 0.70 | 0.7            | 0.65 | -0.9                             | 0.82 | 0.3      | 0.65 |
|        | GLS1       | 1.7     | 0.56 | 0.2           | 0.96 | 2.8            | 0.09 | -1.0                             | 0.82 | -0.3     | 0.09 |
|        | GRIA2      | 1.1     | 0.87 | -0.3          | 0.94 | 0.6            | 0.65 | 0.5                              | 0.82 | -0.1     | 0.65 |
|        | GRIN1      | 1.9     | 0.56 | 1.4           | 0.68 | 1.0            | 0.64 | 0.4                              | 0.82 | 0.6      | 0.64 |
|        | GAD67      | 1.4     | 0.83 | 0.7           | 0.87 | 1.8            | 0.29 | -1.0                             | 0.82 | 0.2      | 0.29 |
|        | vGAT       | -0.4    | 0.93 | 0.2           | 0.96 | 0.8            | 0.64 | -1.9                             | 0.82 | 2.1      | 0.64 |
|        | GAT1       | 0.2     | 0.93 | 0.1           | 0.96 | 0.4            | 0.77 | -1.5                             | 0.82 | 1.7      | 0.77 |
|        | GABRG2     | 1.0     | 0.91 | 0.9           | 0.83 | 3.1            | 0.09 | -0.4                             | 0.82 | 1.5      | 0.09 |
| V2     | EAAT2      | 1.1     | 0.87 | 1.8           | 0.38 | 0.6            | 0.65 | 0.2                              | 0.91 | 1.7      | 0.65 |
|        | vGLUT1     | 0.6     | 0.93 | 0.6           | 0.87 | 0.6            | 0.65 | -1.0                             | 0.82 | 2.6      | 0.65 |
|        | GLS1       | 0.5     | 0.93 | 2.2           | 0.25 | 1.1            | 0.64 | -1.5                             | 0.82 | 0.3      | 0.64 |
|        | GRIA2      | 0.9     | 0.91 | 0.5           | 0.88 | -1.0           | 0.64 | -1.7                             | 0.82 | 1.1      | 0.64 |
|        | GRIN1      | 0.8     | 0.91 | 0.6           | 0.87 | 2.3            | 0.18 | -0.9                             | 0.82 | 1.7      | 0.18 |
|        | GAD67      | 0.2     | 0.93 | 1.9           | 0.38 | 1.6            | 0.37 | -0.9                             | 0.82 | 1.9      | 0.37 |
|        | vGAT       | 0.2     | 0.93 | 0.5           | 0.87 | 2.9            | 0.09 | -0.3                             | 0.83 | 1.8      | 0.09 |
|        | GAT1       | 0.5     | 0.93 | 1.4           | 0.68 | 1.7            | 0.33 | -0.5                             | 0.82 | 2.7      | 0.33 |
|        | GABRG2     | -0.2    | 0.93 | 2.4           | 0.20 | 1.0            | 0.64 | -0.6                             | 0.82 | 1.1      | 0.64 |
| V1     | EAAT2      | 1.1     | 0.87 | -0.1          | 0.96 | 0.1            | 0.90 | 0.5                              | 0.82 | 0.7      | 0.90 |
|        | vGLUT1     | 0.7     | 0.91 | 0.4           | 0.92 | 0.7            | 0.64 | -0.8                             | 0.82 | 3.2      | 0.64 |
|        | GLS1       | 0.7     | 0.91 | 0.7           | 0.87 | 2.1            | 0.23 | -0.8                             | 0.82 | 1.1      | 0.23 |
|        | GRIA2      | 1.7     | 0.56 | 1.0           | 0.81 | 0.9            | 0.64 | 0.1                              | 0.96 | 1.7      | 0.64 |
|        | GRIN1      | -0.1    | 0.96 | 3.2           | 0.15 | 3.3            | 0.09 | -0.5                             | 0.82 | 1.6      | 0.09 |
|        | GAD67      | 1.1     | 0.87 | 1.0           | 0.81 | 2.0            | 0.24 | -0.4                             | 0.82 | 1.9      | 0.24 |
|        | vGAT       | 0.8     | 0.91 | 1.3           | 0.70 | 2.8            | 0.09 | -0.2                             | 0.91 | 2.1      | 0.09 |
|        | GAT1       | 0.1     | 0.93 | 0.9           | 0.83 | 2.0            | 0.24 | -1.1                             | 0.82 | 2.4      | 0.24 |
|        | GABRG2     | -0.2    | 0.93 | 0.8           | 0.83 | 1.4            | 0.44 | -0.5                             | 0.82 | 1.0      | 0.44 |

\*P values corrected for multiple comparisons using the Benjamini-Hochberg Method for False Discovery Rate for each comorbid factor

**Supplemental Table S4. Adjusted P-values using Benjamini-Hochberg Method for False Discovery Rate.**

**Diagnosis, Region and Diagnosis-by-Region effects in 20 matched pairs of comparison subjects and subjects with schizophrenia**

| <b>Transcript</b> | <b>Effect</b>       | <b>F</b>           | <b>P</b> |
|-------------------|---------------------|--------------------|----------|
| EAAT2             | Diagnosis           | $F_{1,114} = 5.6$  | 0.04     |
|                   | Region              | $F_{3,114} = 4.5$  | 0.01     |
|                   | Diagnosis by Region | $F_{3,114} = 16.0$ | < 0.001  |
| vGLUT1            | Diagnosis           | $F_{1,114} = 9.3$  | 0.008    |
|                   | Region              | $F_{3,114} = 56.1$ | < 0.001  |
|                   | Diagnosis by Region | $F_{3,114} = 0.4$  | 0.85     |
| GLS1              | Diagnosis           | $F_{1,114} = 0.8$  | 0.50     |
|                   | Region              | $F_{3,114} = 0.2$  | 0.92     |
|                   | Diagnosis by Region | $F_{3,114} = 0.7$  | 0.63     |
| GRIA2             | Diagnosis           | $F_{1,114} = 1.2$  | 0.42     |
|                   | Region              | $F_{3,114} = 93.3$ | < 0.001  |
|                   | Diagnosis by Region | $F_{3,114} = 0.8$  | 0.61     |
| GRIN1             | Diagnosis           | $F_{1,114} = 2.4$  | 0.21     |
|                   | Region              | $F_{3,114} = 9.9$  | < 0.001  |
|                   | Diagnosis by Region | $F_{3,114} = 2.3$  | 0.16     |
| GAD67             | Diagnosis           | $F_{1,114} = 1.5$  | 0.37     |
|                   | Region              | $F_{3,114} = 13.4$ | < 0.001  |
|                   | Diagnosis by Region | $F_{3,114} = 0.6$  | 0.69     |
| vGAT              | Diagnosis           | $F_{1,114} = 2.7$  | 0.19     |
|                   | Region              | $F_{3,114} = 14.3$ | < 0.001  |
|                   | Diagnosis by Region | $F_{3,114} = 2.8$  | 0.09     |
| GAT1              | Diagnosis           | $F_{1,114} = 0.0$  | 0.98     |
|                   | Region              | $F_{3,114} = 8.0$  | 0.0002   |
|                   | Diagnosis by Region | $F_{3,114} = 5.9$  | 0.003    |
| GABRG2            | Diagnosis           | $F_{1,114} = 0.8$  | 0.50     |
|                   | Region              | $F_{3,114} = 21.7$ | < 0.001  |
|                   | Diagnosis by Region | $F_{3,114} = 0.7$  | 0.63     |

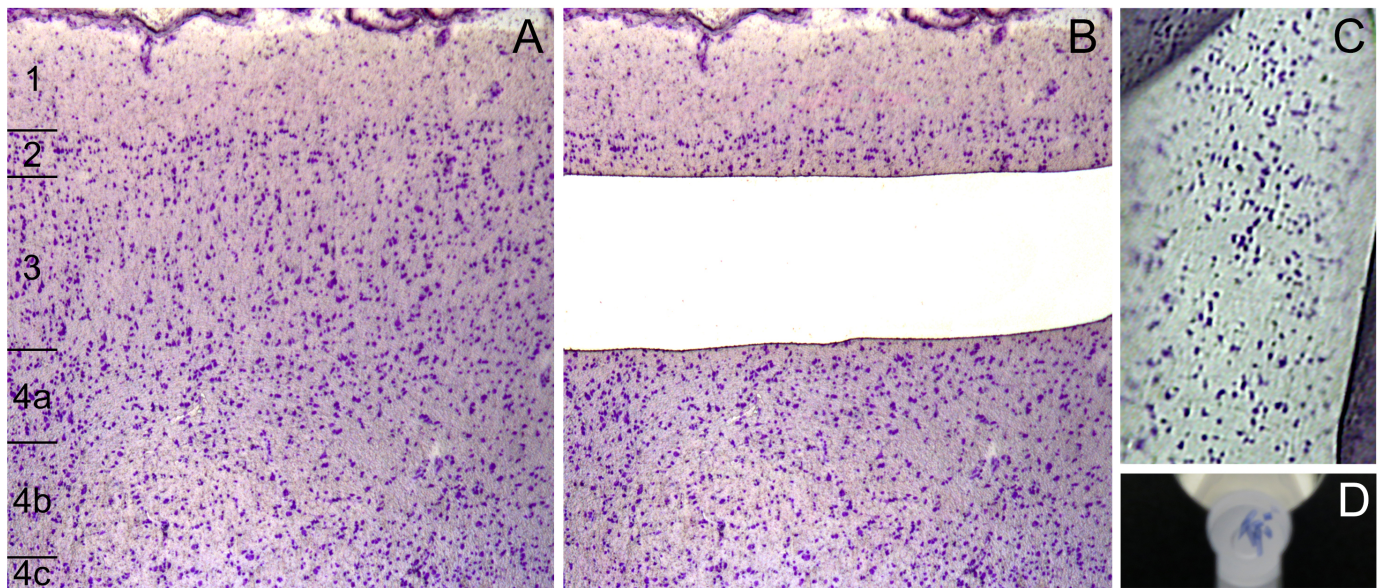

**Supplemental Figure S1. Laser capture microdissection approach.** **A.** Representative image of V1 with the laminar boundaries demarcated before microdissection. **B.** The same area of V1 with layer 3 microdissected and captured into the microcentrifuge tube cap. **C.** 5X magnification image of the resulting layer 3 tissue strip captured in the microcentrifuge tube cap. **D.** Representative example of a tube cap with layer 3 strips captured after tissue microdissection from a single subject.

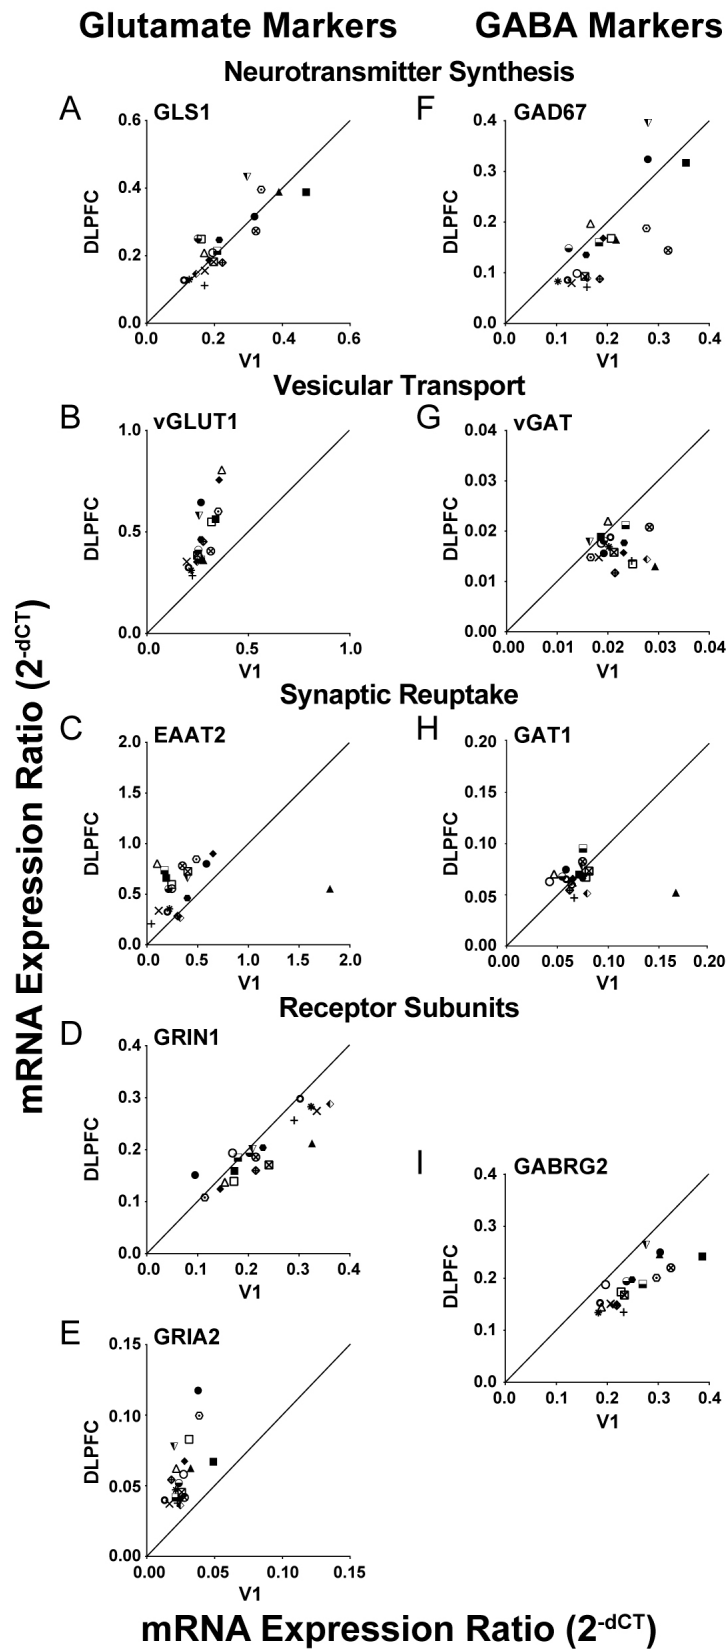

**Supplemental Figure S2. Differences between V1 and DLPFC in expression levels of glutamate and GABA marker transcripts in unaffected comparison subjects.** Individual subject symbols are the same across region and transcript for all graphs. V1, primary visual cortex; DLPFC, dorsolateral prefrontal cortex.



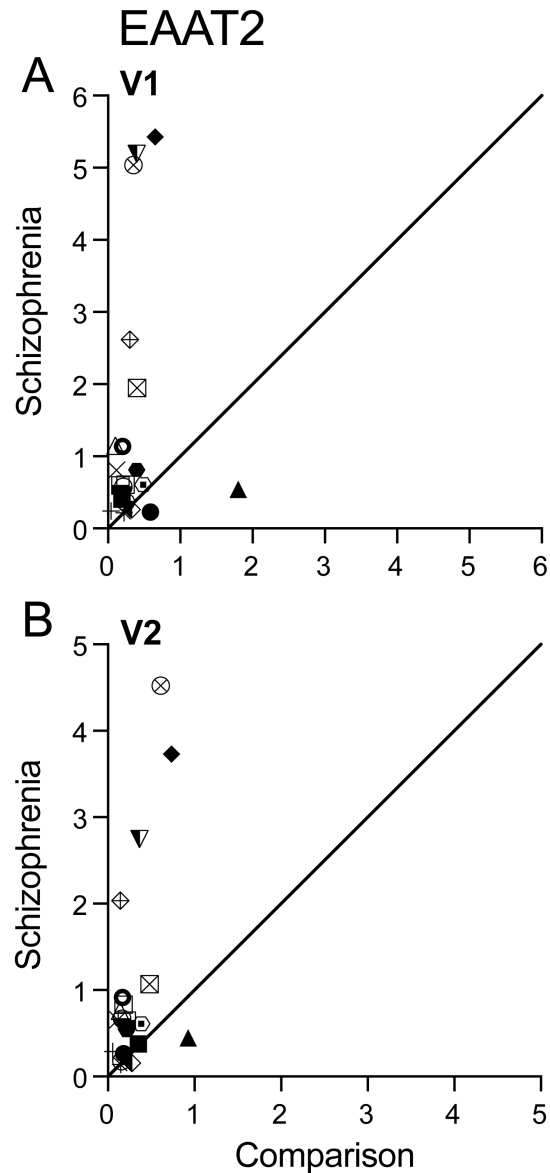

**Supplemental Figure S3. EAAT2 unity plots for V1 and V2. A.** Unity plot for V1. **B.** Unity plot for V2. Individual subject pair symbols are the same across region. Mean EAAT2 mRNA levels were higher in V1 (+286%) and V2 (+258%) in schizophrenia. When excluding the subject pairs with mean percent differences > 1000% (3 subject pairs in V1 and 1 subject pair in V2), the mean percent differences were still higher in V1 (+163%) and V2 (+232%). V1 = primary visual cortex; V2 = association visual cortex.

## Supplemental References

1. Danbolt NC. (2001). Glutamate uptake. *Prog Neurobiol*, 65(1), 1-105.
2. Rose CF, Verkhratsky A, Parpura V. (2013). Astrocyte glutamine synthetase: pivotal in health and disease. *Biochem Soc Trans*, 41(6), 1518-1524.
3. Pinal CS, Tobin AJ. (1998). Uniqueness and redundancy in GABA production. *Perspect Dev Neurobiol*, 5(2-3), 109-118.
4. Eiden LE. (2000). The vesicular neurotransmitter transporters: current perspectives and future prospects. *FASEB J*, 14(15), 2396-2400.
5. Liu Y, Edwards RH. (1997). The role of vesicular transport proteins in synaptic transmission and neural degeneration. *Annu Rev Neurosci*, 20, 125-156.
6. Robinson MB. (1998). The family of sodium-dependent glutamate transporters: a focus on the GLT-1/EAAT2 subtype. *Neurochem Int*, 33(6), 479-491.
7. Conti F, Melone M, De Biasi S, Minelli A, Brecha NC, Ducati A. (1998). Neuronal and glial localization of GAT-1, a high-affinity gamma-aminobutyric acid plasma membrane transporter, in human cerebral cortex: with a note on its distribution in monkey cortex. *J Comp Neurol*, 396(1), 51-63.
8. Guastella J, Nelson N, Nelson H, Czyzyk L, Keynan S, Miedel MC, et al. (1990). Cloning and expression of a rat brain GABA transporter. *Science*, 249(4974), 1303-1306.
9. Conti F, Minelli A, Melone M. (2004). GABA transporters in the mammalian cerebral cortex: localization, development and pathological implications. *Brain Res Brain Res Rev*, 45(3), 196-212.
10. Beneyto M, Meador-Woodruff JH. (2004). Expression of transcripts encoding AMPA receptor subunits and associated postsynaptic proteins in the macaque brain. *J Comp Neurol*, 468(4), 530-554.
11. Traynelis SF, Wollmuth LP, McBain CJ, Menniti FS, Vance KM, Ogden KK, et al. (2010). Glutamate receptor ion channels: structure, regulation, and function. *Pharmacol Rev*, 62(3), 405-496.
12. Henley JM, Wilkinson KA. (2016). Synaptic AMPA receptor composition in development, plasticity and disease. *Nat Rev Neurosci*, 17(6), 337-350.
13. Jacob TC, Moss SJ, Jurd R. (2008). GABA(A) receptor trafficking and its role in the dynamic modulation of neuronal inhibition. *Nat Rev Neurosci*, 9(5), 331-343.
